# Supplementary material for: Study protocol for FIBROKIT: a new tool for fibromyalgia diagnosis and patient follow-up
Source: Frontiers journal article supplement (doi:10.3389/fneur.2023.1286539), 2023-11-21

## VALIDATION OF BIOMARKERS RELATED TO FIBROMYALGIA AND THEIR USEFULNESS IN THE DIAGNOSIS AND FOLLOW-UP OF PATIENTS

### Dietary and washout guidelines for participants prior to the start of the intervention:

- It is recommended to eat at least 3 pieces of fruit daily and whole, preferably seasonal and proximity. Avoid juices
- Vegetables should be eaten for lunch and dinner, you can always change one vegetable for another one or you can modify the type of preparation (it is similar to taking a cream as a raw vegetable, for example).
- Cereals, bread, flours and pasta, preferably whole grain or whole grain.
- You can accompany meals with bread.
- Select natural nuts, e.g. not fried or salted. It is recommended to take several servings a week.
- To drink, choose water preferably. Drink between 4-6 glasses a day.
- For dessert you can always have fruit, yogurt, an ounce of chocolate or tea.
- Natural yogurts (preferably unsweetened and unsweetened) are recommended.
- Fish can be swapped for each other, as can meat.
- Rice, potato, pasta, and quinoa can be swapped for each other.
- Vegetables (greens) can be swapped for each other.
- Salads on the menu: you can combine lettuce, lamb's lettuce, arugula, endives, tomatoes, cucumbers, peppers, carrots, peppers, spring onions, beetroot, kale, green beans...
- It is recommended to consume legumes at least twice a week, the same time can be repeated. Avoid fatty preparations (such as adding bacon or chorizo) and they can also be eaten in salads.
- The way of cooking or preparation or presentation suggestion, are just a suggestion, you can change it for another that is to your liking.
- In the mid-mornings and snacks you can combine several options, if you are not hungry you do not need to do it.
- **Important:** The washing period is 2 weeks. You can choose to follow any of the 3 options presented here during that period. Once the washing period is over, you will be provided with the corresponding oil (Type A or Type B) and you must consume it as indicated in the 3 menus listed below.
- If you have any questions or suggestions regarding the menus, please contact any of the following emails: [info@grupocinusa.es](mailto:info@grupocinusa.es) / [fibromialgia@pronacera.com](mailto:fibromialgia@pronacera.com)

Week 1

|             | Monday                                                                                                                                                                                                                                                                                                                                                                                                                       | Tuesday                                                                                     | Wednesday                                                                                            | Thursday                                                                 | Friday                                                                | Saturday                                                                                  | Sunday                                                        |
|-------------|------------------------------------------------------------------------------------------------------------------------------------------------------------------------------------------------------------------------------------------------------------------------------------------------------------------------------------------------------------------------------------------------------------------------------|---------------------------------------------------------------------------------------------|------------------------------------------------------------------------------------------------------|--------------------------------------------------------------------------|-----------------------------------------------------------------------|-------------------------------------------------------------------------------------------|---------------------------------------------------------------|
| Breakfast   | To drink: Infusion/Milk/Vegetable drink with no added sugar<br>You can accompany it with:<br>Option 1: Fruit<br>Option 2: Toast <b>with olive oil</b> and/or tomato<br>Option 3: Avocado + <b>Olive Oil Toast</b><br>Option 4: Toast with fresh cheese and tomato + with <b>olive oil</b><br>Option 5: Cereal flakes<br>Option 6: Plain yoghurt with cereal flakes<br>You can optionally add fruit to options 2,3,4, 5 and 6 |                                                                                             |                                                                                                      |                                                                          |                                                                       |                                                                                           |                                                               |
| Mid-morning | Option 1: Fruit<br>Option 2: A handful of natural nuts<br>Option 3: Toast with olive oil and/or tomato and/or fresh cheese and/or serrano ham / and/or turkey + with olive oil<br>Option 4: Plain yogurt                                                                                                                                                                                                                     |                                                                                             |                                                                                                      |                                                                          |                                                                       |                                                                                           |                                                               |
| Food        | Salad + <b>olive oil</b><br><br>Lentils cooked with vegetables                                                                                                                                                                                                                                                                                                                                                               | Baked aubergine stuffed with vegetables, minced meat, natural crushed tomato and mozzarella | Salmon papillote with roasted potato + <b>olive oil</b><br><br>Roasted zucchini and butternut squash | Salad + <b>olive oil</b><br><br>Chickpeas with vegetables                | Turkey tenderloin with pepper and roasted apple<br><br>Vegetable stew | Pasta with vegetables, natural crushed tomato and prawns + with <b>olive oil</b>          | Salad + <b>olive oil</b><br><br>Vegetable paella with chicken |
| Snack       | Option 1: Fruit<br>Option 2: A handful of natural nuts<br>Option 3: Toast with olive oil and/or tomato and/or fresh cheese and/or serrano ham / and/or turkey + with olive oil<br>Option 4: Plain yogurt<br>Option 5: Plain yogurt with pure seeds/fruit/cocoa                                                                                                                                                               |                                                                                             |                                                                                                      |                                                                          |                                                                       |                                                                                           |                                                               |
| Dinner      | Grilled vegetables with quinoa and grilled egg                                                                                                                                                                                                                                                                                                                                                                               | Grilled sea bream with spring onion<br><br>Mushrooms + <b>olive oil</b>                     | Cream of zucchini + <b>olive oil</b><br><br>Omelette                                                 | Roasted pepper salad with spring onion and tuna belly + <b>olive oil</b> | Grilled cuttlefish with parsley<br><br>Salad + <b>olive oil</b>       | Potato omelette<br><br>Green beans with carrot + <b>olive oil</b> and apple cider vinegar | Grilled wild asparagus + <b>olive oil</b><br><br>Grilled sole |

Week 2

|             | Monday                                                                                                                                                                                                                                                                                                                                                                                                                       | Tuesday                                                       | Wednesday                                                      | Thursday                                                                    | Friday                                                             | Saturday                                          | Sunday                                                        |
|-------------|------------------------------------------------------------------------------------------------------------------------------------------------------------------------------------------------------------------------------------------------------------------------------------------------------------------------------------------------------------------------------------------------------------------------------|---------------------------------------------------------------|----------------------------------------------------------------|-----------------------------------------------------------------------------|--------------------------------------------------------------------|---------------------------------------------------|---------------------------------------------------------------|
| Breakfast   | To drink: Infusion/Milk/Vegetable drink with no added sugar<br>You can accompany it with:<br>Option 1: Fruit<br>Option 2: Toast <b>with olive oil</b> and/or tomato<br>Option 3: Avocado + <b>Olive Oil Toast</b><br>Option 4: Toast with fresh cheese and tomato + with <b>olive oil</b><br>Option 5: Cereal flakes<br>Option 6: Plain yoghurt with cereal flakes<br>You can optionally add fruit to options 2,3,4, 5 and 6 |                                                               |                                                                |                                                                             |                                                                    |                                                   |                                                               |
| Mid-morning | Option 1: Fruit<br>Option 2: A handful of natural nuts<br>Option 3: Toast with olive oil and/or tomato and/or fresh cheese and/or serrano ham / and/or turkey + with olive oil<br>Option 4: Plain yogurt                                                                                                                                                                                                                     |                                                               |                                                                |                                                                             |                                                                    |                                                   |                                                               |
| Food        | Cod with natural crushed tomato, spring onion, potato and salad + <b>olive oil</b>                                                                                                                                                                                                                                                                                                                                           | Roast Chicken with Vegetables<br><br>Rice garnish             | Salad + <b>olive oil</b><br><br>Lentils cooked with vegetables | Grilled tuna with sesame seeds<br><br>Salad with avocado + <b>olive oil</b> | Salad + <b>olive oil</b><br><br>White Beans Cooked with Vegetables | Salad + <b>olive oil</b><br><br>Seafood noodles   | Pumpkin cream + <b>olive oil</b><br><br>Baked pork tenderloin |
| Snack       | Option 1: Fruit<br>Option 2: A handful of natural nuts<br>Option 3: Toast with olive oil and/or tomato and/or fresh cheese and/or serrano ham / and/or turkey + with olive oil<br>Option 4: Plain yogurt<br>Option 5: Plain yogurt with pure seeds/fruit/cocoa                                                                                                                                                               |                                                               |                                                                |                                                                             |                                                                    |                                                   |                                                               |
| Dinner      | Scrambled eggs with mushrooms and spring onion                                                                                                                                                                                                                                                                                                                                                                               | Homemade soup with noodles<br><br>Grilled rooster with spices | Sautéed spinach with potatoes and serrano ham cubes            | Grilled zucchini + <b>olive oil</b><br><br>Grilled chicken                  | Carrot cream + <b>olive oil</b><br><br>Baked sea bass              | Homemade Chicken Burger<br><br>Grilled vegetables | Omelette<br><br>Homemade vegetable ratatouille                |

Week 3

|             | Monday                                                                                                                                                                                                                                                                                                                                                                                                                       | Tuesday                                                                                      | Wednesday                                                                          | Thursday                                                         | Friday                                                                       | Saturday                                                                                                | Sunday                                                                                                     |
|-------------|------------------------------------------------------------------------------------------------------------------------------------------------------------------------------------------------------------------------------------------------------------------------------------------------------------------------------------------------------------------------------------------------------------------------------|----------------------------------------------------------------------------------------------|------------------------------------------------------------------------------------|------------------------------------------------------------------|------------------------------------------------------------------------------|---------------------------------------------------------------------------------------------------------|------------------------------------------------------------------------------------------------------------|
| Breakfast   | To drink: Infusion/Milk/Vegetable drink with no added sugar<br>You can accompany it with:<br>Option 1: Fruit<br>Option 2: Toast <b>with olive oil</b> and/or tomato<br>Option 3: Avocado + <b>Olive Oil Toast</b><br>Option 4: Toast with fresh cheese and tomato + with <b>olive oil</b><br>Option 5: Cereal flakes<br>Option 6: Plain yoghurt with cereal flakes<br>You can optionally add fruit to options 2,3,4, 5 and 6 |                                                                                              |                                                                                    |                                                                  |                                                                              |                                                                                                         |                                                                                                            |
| Mid-morning | Option 1: Fruit<br>Option 2: A handful of natural nuts<br>Option 3: Toast with olive oil and/or tomato and/or fresh cheese and/or serrano ham / and/or turkey + with olive oil<br>Option 4: Plain yogurt                                                                                                                                                                                                                     |                                                                                              |                                                                                    |                                                                  |                                                                              |                                                                                                         |                                                                                                            |
| Food        | Salad +<br><b>olive oil</b><br><br>Lentils<br>cooked<br>with<br>vegetables                                                                                                                                                                                                                                                                                                                                                   | Beef stew<br>with potato,<br>peas and<br>vegetables                                          | Baked zucchini<br>stuffed with<br>quinoa,<br>vegetables<br>and tuna,<br>mozzarella | Salad +<br><b>olive oil</b><br><br>Cooked                        | Rice with<br>turmeric,<br>vegetables<br>(carrot,<br>zucchini...),<br>chicken | Baked<br>hake with<br>clams and<br>roasted<br>potato<br><br>Roasted<br>vegetables<br>+ <b>olive oil</b> | Pasta with<br>vegetables<br>(wild<br>asparagus,<br>spring<br>onion...) and<br>salmon +<br><b>olive oil</b> |
| Snack       | Option 1: Fruit<br>Option 2: A handful of natural nuts<br>Option 3: Toast with olive oil and/or tomato and/or fresh cheese and/or serrano ham / and/or turkey + with olive oil<br>Option 4: Plain yogurt<br>Option 5: Plain yogurt with pure seeds/fruit/cocoa                                                                                                                                                               |                                                                                              |                                                                                    |                                                                  |                                                                              |                                                                                                         |                                                                                                            |
| Dinner      | Vegetable<br>stew<br><br>Grilled<br>chicken                                                                                                                                                                                                                                                                                                                                                                                  | French<br>omelette with<br>prawns<br><br>Cream of<br>mushroom<br>soup + <b>olive<br/>oil</b> | Artichokes +<br><b>olive oil</b><br><br>Grilled chicken                            | Potato<br>omelette<br><br>Pumpkin<br>cream +<br><b>olive oil</b> | Green<br>beans with<br>tomato<br><br>Turbot                                  | Spinach<br>with egg<br><br>Vegetable<br>soup                                                            | Grilled turkey<br>tenderloin<br>with pepper<br><br>Sautéed Swiss<br>chard                                  |

## GENERAL AND ORGANIZATIONAL INFORMATION:

You will receive **weekly rotating menu planning** so that you can have a **balanced, complete and nutritious diet** with the support of registered Dietitians-Nutritionists.

In addition, during the 6 months of nutritional intervention of the study, you will receive the daily dose of olive oil that you must include in your diet every day, **raw** (without being able to be used in culinary preparations). These rigid plastic sachets have a capacity of 50 ml, which is approximately equivalent to 5 tablespoons.

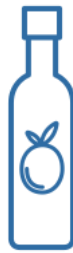

In order to **comply with the daily indications** of the oil intake proposed in the study, here are some **examples**:

- 1) Toast of bread with oil:

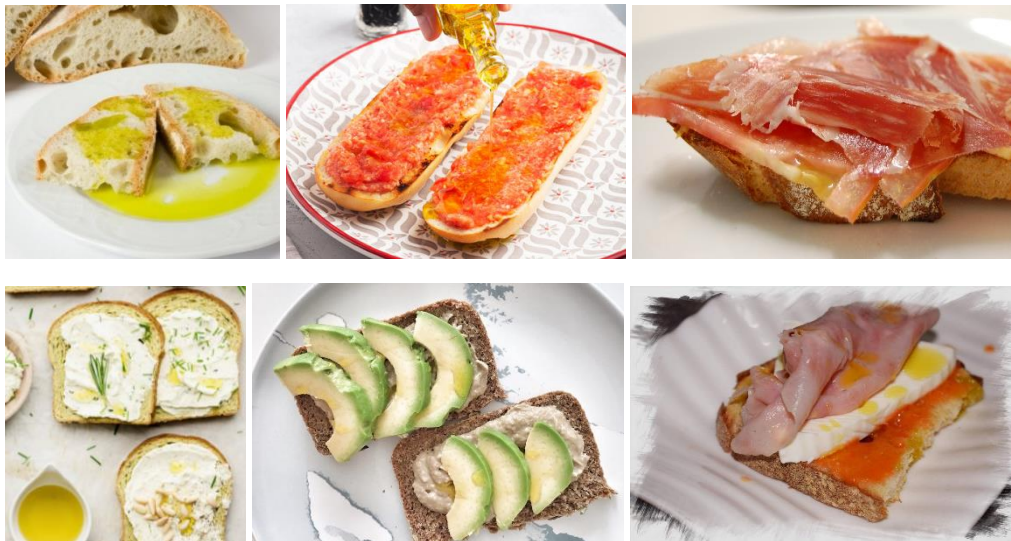

- 2) Splash of oil as a dressing in salads:

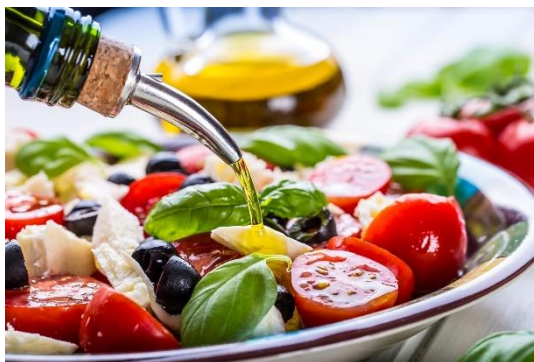

- 3) Splash of oil as a presentation in creams or salmorejo / gazpacho:

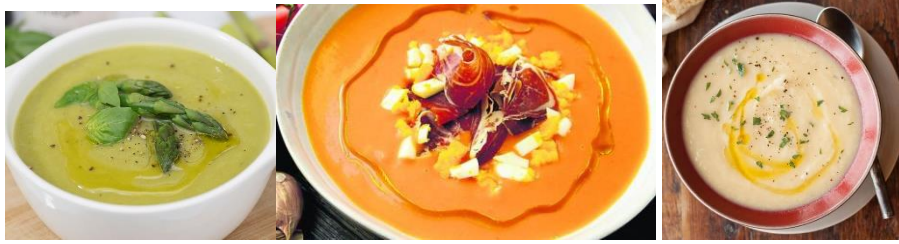

4) Splash of oil on cooked vegetables (steamed/boiled):

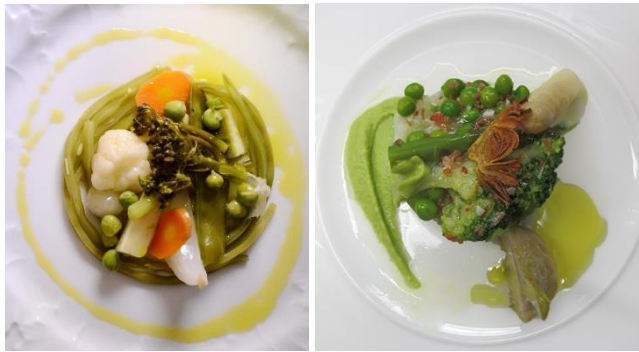

5) Splash of oil as a presentation in boiled or roasted potatoes:

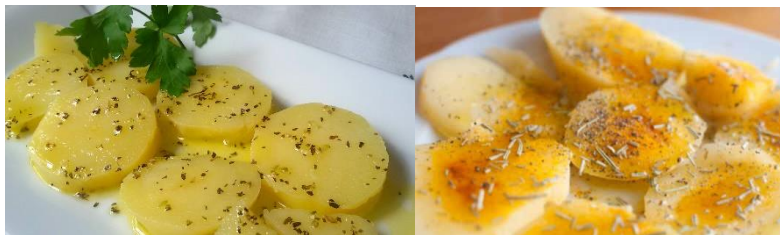

Supplement: Data_Sheet_1.PDF [file Data_Sheet_1.PDF]
